# Supplementary material for: Hydrothermal synthesis of rhodium-doped barium titanate nanocrystals for enhanced photocatalytic hydrogen evolution under visible light
Source: Royal Society of Chemistry journal article supplement (doi:10.1039/c5ra20044j), 2015-01-01
Supplement: c5ra20044j1.pdf [file c5ra20044j1.pdf]

*Electronic Supplementary Information (ESI)*

# Hydrothermal synthesis of rhodium-doped barium titanate nanocrystals for enhanced photocatalytic hydrogen evolution under visible light

*Shunta Nishioka, Kazuhiko Maeda\**

Department of Chemistry, Graduate School of Science and Engineering, Tokyo Institute of Technology,  
2-12-1-NE-2 Ookayama, Meguro-ku, Tokyo 152-8550, Japan.

\*To whom corresponding author should be addressed.

TEL: +81-3-5734-2239, FAX: +81-3-5734-2284

Email: [maedak@chem.titech.ac.jp](mailto:maedak@chem.titech.ac.jp)

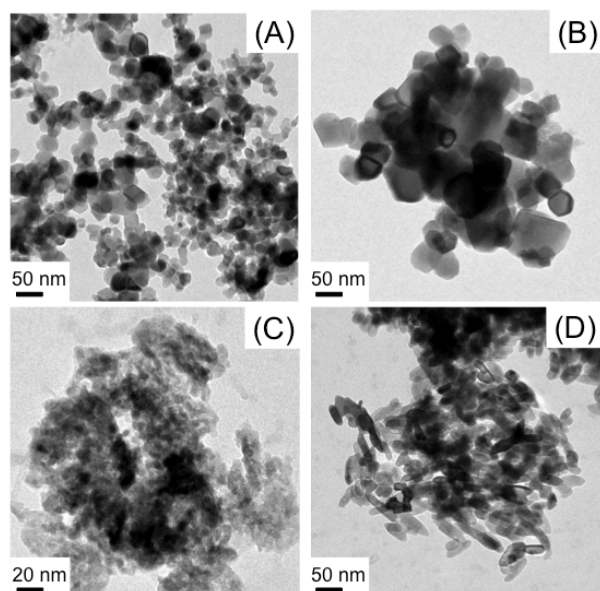

**Fig. S1.** TEM images of TiO<sub>2</sub> used as the starting material in this work.

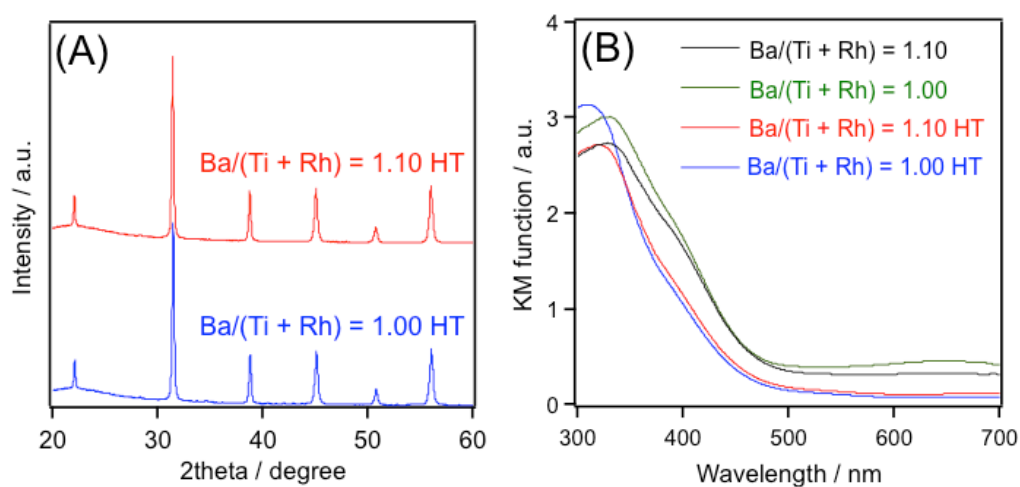

**Fig. S2.** (A) XRD patterns and (B) UV-visible diffuse reflectance spectra of BaTiO<sub>3</sub>:Rh prepared with and without addition of an excess amount of Ba(OH)<sub>2</sub>·8H<sub>2</sub>O (10 mol%) in the HT process (without post-heating). Data for the samples after post-heating at 1173 K with an excess amount of Ba(OH)<sub>2</sub>·8H<sub>2</sub>O (5 mol%) are also shown. Here P25 TiO<sub>2</sub> was used in all cases.

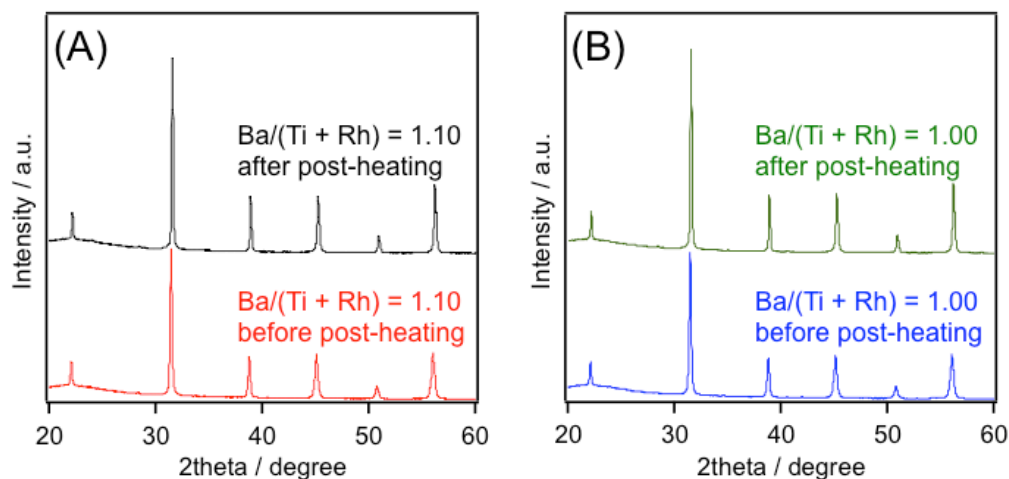

**Fig. S3.** XRD patterns of BaTiO<sub>3</sub>:Rh prepared (A)with and (B)without addition of an excess amount of Ba(OH)<sub>2</sub>·8H<sub>2</sub>O (10 mol%) in the HT process (without post-heating) and after post-heating at 1173 K with an excess amount of Ba(OH)<sub>2</sub>·8H<sub>2</sub>O (5 mol%).

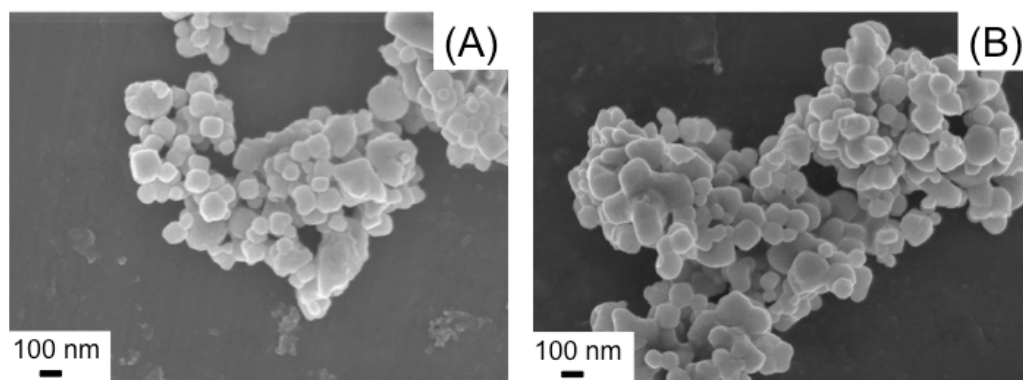

**Fig. S4.** SEM images of BaTiO<sub>3</sub>:Rh prepared (A)with and (B)without addition of an excess amount of Ba(OH)<sub>2</sub>·8H<sub>2</sub>O (10 mol%) in the HT process, further post-heated at 1173 K with an excess amount of Ba(OH)<sub>2</sub>·8H<sub>2</sub>O (5 mol%).

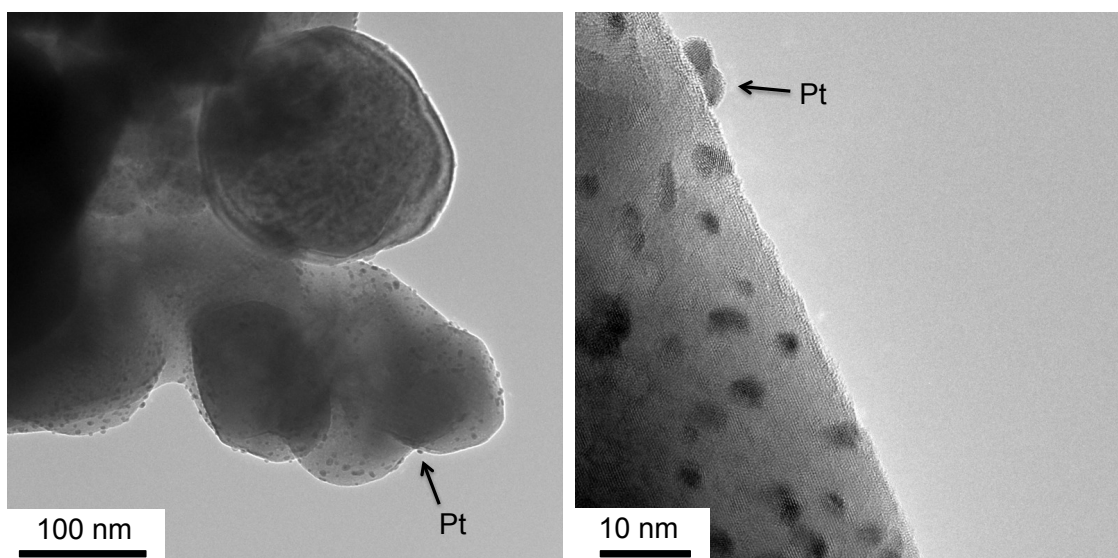

**Fig. S5.** TEM images of 0.5 wt% Pt-loaded BaTiO<sub>3</sub>:Rh, which was prepared with addition of an excess amount of Ba(OH)<sub>2</sub>·8H<sub>2</sub>O (10 mol%) in the HT process, further post-heated at 1273 K with an excess amount of Ba(OH)<sub>2</sub>·8H<sub>2</sub>O (5 mol%).

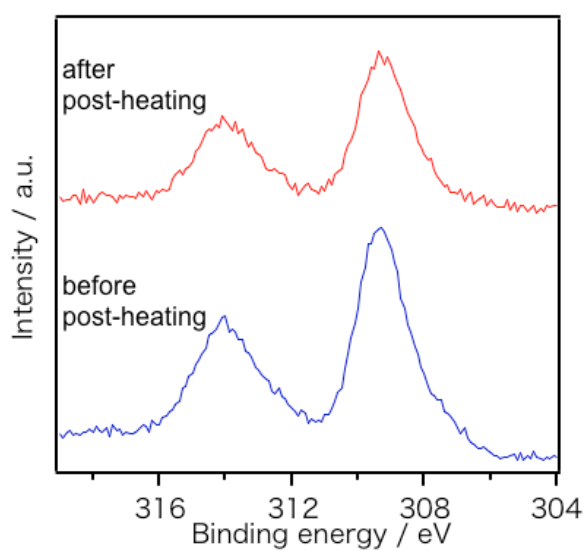

**Fig. S6.** XPS spectra for Rh 3d of BaTiO<sub>3</sub>:Rh before and after post-heated at 1173 K in the presence of an additional Ba(OH)<sub>2</sub>·8H<sub>2</sub>O (5.0 mol.%).

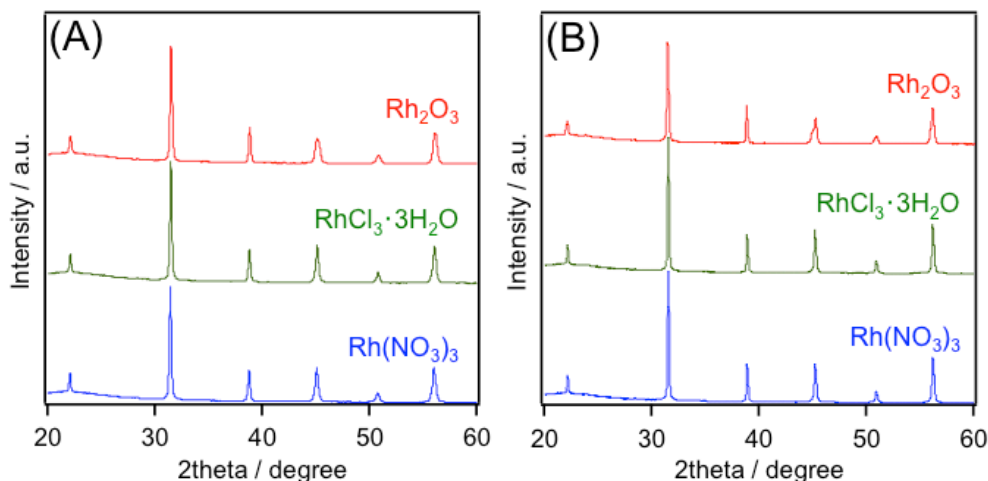

**Fig. S7.** XRD patterns of a hydrothermally synthesized BaTiO<sub>3</sub>:Rh with different Rh sources. (A) before and (B) after post-heating at 1173 K.

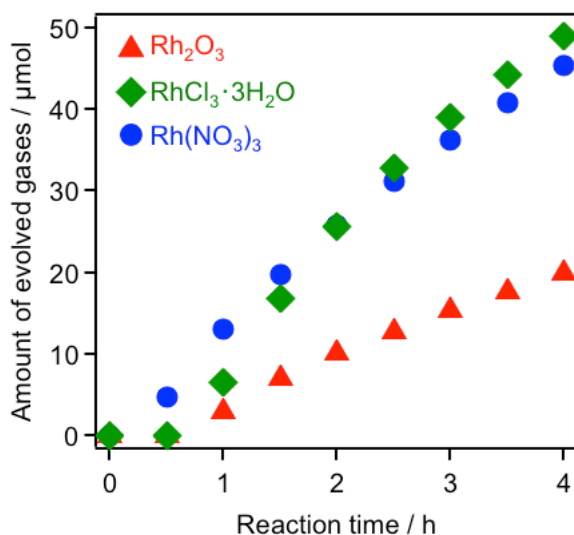

**Fig. S8.** Time courses of H<sub>2</sub> evolution from an aqueous methanol solution using Pt/BaTiO<sub>3</sub>:Rh with different Rh sources under visible light ( $\lambda > 420$  nm). Reaction conditions: catalyst, 100 mg; aqueous methanol solution (10 vol%, 100 mL); light source, xenon lamp (300 W) with a cold mirror (CM-1) and a cutoff filter (L42); reaction vessel, Pyrex top-irradiation type. These samples were post-heated at 1173 K.
